# Supplementary material
Source: Springer Nature journal article supplement (https://www.springermedizin.de/resource/supplementary/12997_2011_72_MOESM5_ESM.pdf/9623258)

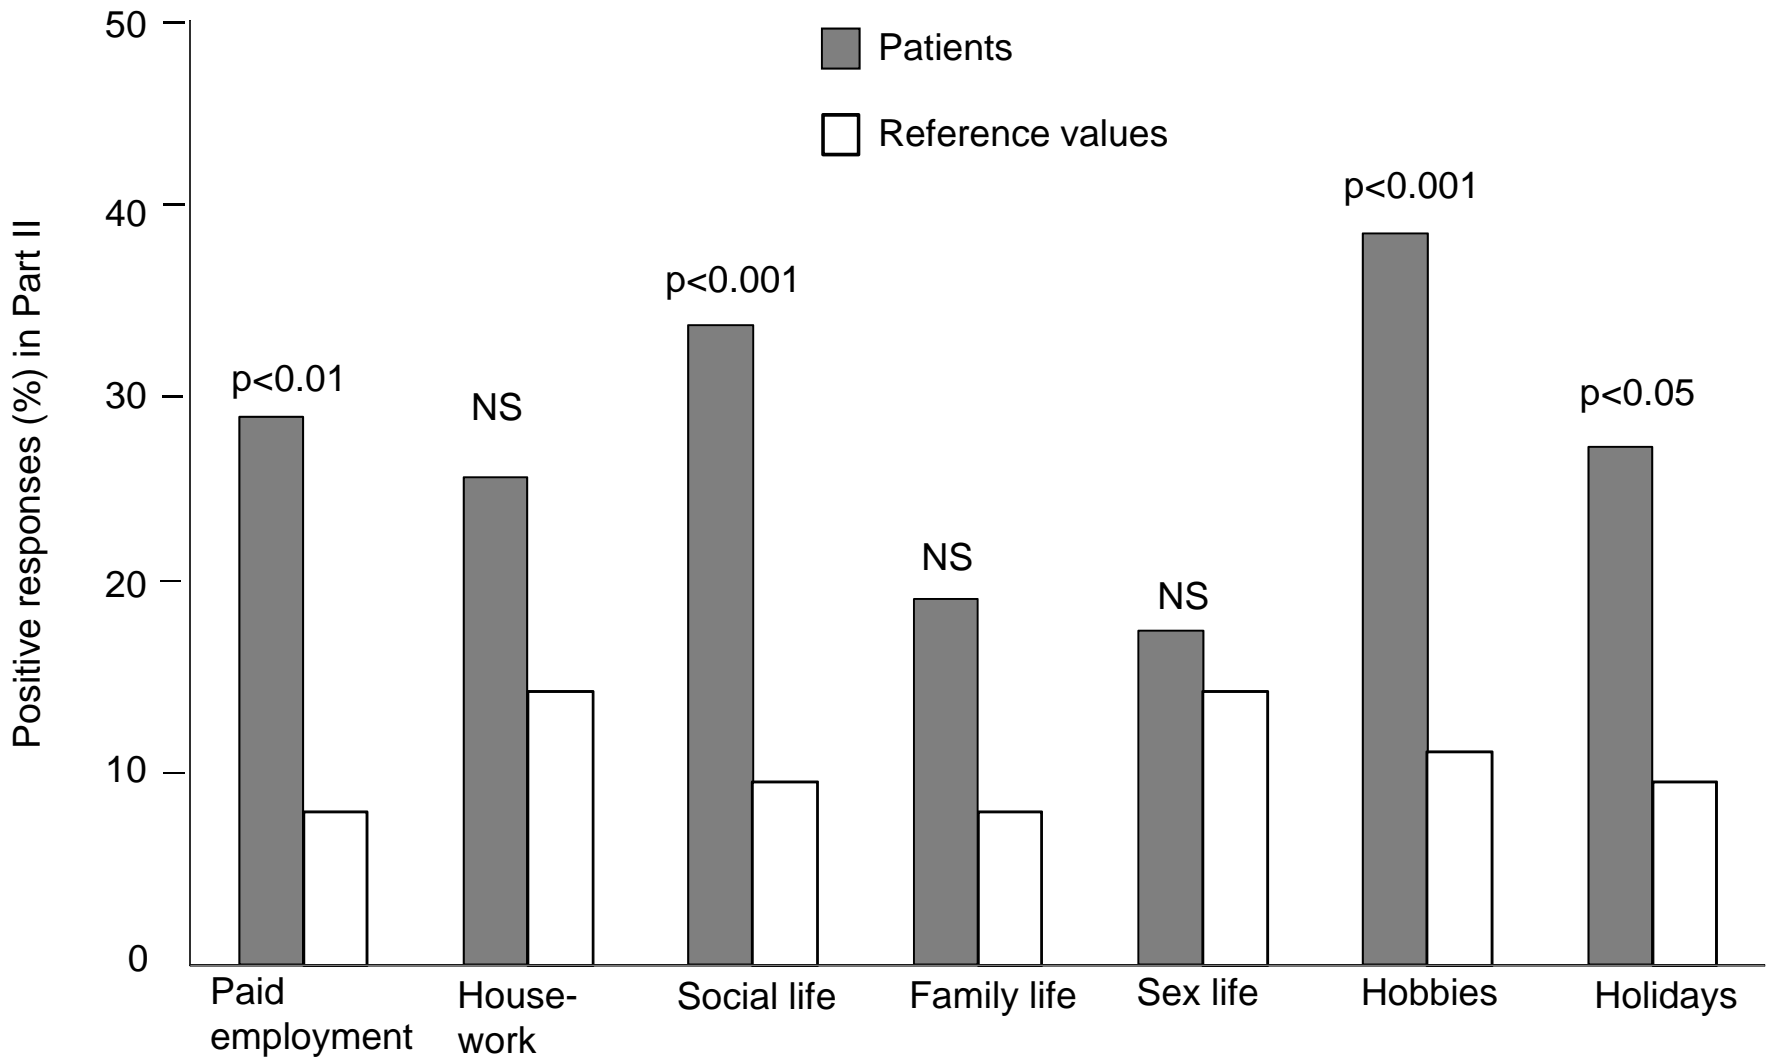

Supplement: MOESM5 [file 9623258]
